# Supplementary material for: Loci Controlling Adaptation to Heat Stress Occurring at the Reproductive Stage in Durum Wheat
Source: Preprints.org preprint supplement (doi:10.20944/preprints201906.0295.v1), 2019-06-28
Supplement: Supplementary file 1 [file supplementary]

Loci controlling adaptation to heat stress occurring at the reproductive stage in durum wheat

Khaoula El Hassouni 1,2, Bouchra Belkadi 2, Abdelkarim Filali-Maltouf 2, Amadou Tidiane-Sall 1,3, Ayed Al-Abdallat 4, Miloudi Nachit 1,2, Filippo M. Bassi 1,*

**Supplementary document**

**Table S1.** List of durum wheat genotypes evaluated under plastic tunnel-mediated heat stress in the present study.

| **Accession name** | **Origin** | **Pedigree** |
| --- | --- | --- |
| ADYT_046 | ICARDA | IcamorTA041/4/IcamorTA0469/3/Bcr/Gro1//Mgnl1/5/MIKI2 |
| ADYT_104 | ICARDA | Bcr/Lks4//Mrf1/Stj2/3/Ouasbar2 |
| ADYT_120 | ICARDA | Aghrass1/3/HFN94N8/Mrb5//Zna1/4/IcamorTA0458 |
| Berghouata1 | ICARDA | Ter1//Mrf1/Stj2 |
| Bezaghras | ICARDA | Ossl1/Stj5/5/Bicrederaa1/4/BezaizSHF//SD19539/Waha/3/Stj/Mrb3/6/Mgnl3/Aghrass2 |
| CaMdoH25 | ICARDA | CM829/CandocrossH25 |
| Chacan | ICARDA | Cham1/5/Cando/4/BY*2/Tace//II27655/3/Tme//ZB/W*2 |
| DP0257 | CIMMYT | 1A.1D5+106/2*WB881//1A.1D5+106/3*Mojo/3/Bisu_1/Patka_3 |
| DP0261 | CIMMYT | Cndo/Primadur//Haiou_17/3/Snturkmi8384375/NIGRIS_5//TANTLO_1 |
| DP0269 | CIMMYT | Somat_3/Phax_1//Tilo_1/Lotus_4 |
| DP062 | ICARDA | Chhb88/Deraa |
| DWAyT-0209 | ICARDA | Korifla/Ae.SpeltoidesSyr//Amedakul |
| DWAyT-0215 | ICARDA | Korifla/Ae.SpeltoidesSyr//Amedakul |
| DWAyT-0217 | ICARDA | Korifla/Aeg.SpeltoidesSyr//Loukos |
| DWAyT-0224 | ICARDA | Korifla/Ae.SpeltoidesSyr//Waha |
| DWAyT-0306 | ICARDA | Korifla/Ae.SpeltoidesSyr//Heider |
| Faraj | ICARDA/  Morocco | F413J.S/3/Arthur71/Lahn//Blk2/Lahn/4/Quarmal |
| Icavicre | ICARDA | IcamorTA0468/6/21563/AA//Fg/3/D68102A2A1A/4/Vitron/5/Bcr |
| IDON37-010 | ICARDA | Marsyr3/3/Gcn//Stj/Mrb3 |
| IDON37-033 | ICARDA | Mgnl3/Ainzen1//Ammar1 |
| IDON37-039 | ICARDA | Mgnl3/Ainzen1/3/Ter1//Mrf1/Stj2 |
| IDON37-062 | ICARDA | Ter1/3/Stj3//Bcr/Lks4/4/Icajihan18 |
| IDON37-094 | ICARDA | Aghrass1//Bezaiz982/Bcrch1/4/IcamorTA0462/3/Quabrach3//Vitron/Bidra1/5/Stj3//Bcr/Lks4/3/Ter3 |
| IDON37-097 | ICARDA | Mgnl3/Ainzen1/3/Bcr/Gro1//Mgnl1 |
| IDON37-129 | ICARDA | CM829/CandocrossH25//Icajihan10 |
| IDON37-141 | ICARDA | IcamorTA0471//IcamorTA0459/Ammar8/4/Stj3//Dra2/Bcr/3/Ter3 |
| IDON37-143 | ICARDA | Mrb3/Mna1//Ter1/3/IcamorTA0459/Ammar7/4/Beltagy2 |
| IDYT37-19 | ICARDA | Mgnl3/Ainzen1//Maamouri3 |
| IG:88029 | Ethiopia | Landrace |
| Isly | Morocco | Erpel(SIB)/(SIB)Ruso |
| Karim | CIMMYT | Jori69(SIB)/(SIB)Anhinga//(SIB)Flamingo |
| Kunmiki | ICARDA | MorlF38//Bcrch1/Kund1149/3/Bicrederaa1/Miki |
| Louiza | Morocco | na |
| Margherita 2 | ICARDA | Terbol975/Geruftel2 |
| MCHCB-083 | ICARDA | Cham5*4/Ae.Speltoides401294/4/IcamorTA0469/3/Bcr/Gro1//Mgnl1/5/Stj3//Bcr/Lks4/3/Ter3 |
| MCHCB-095 | ICARDA | Mck2/Tilo2//Bcrch1/Kund1149 |
| Moulsabil2 | ICARDA | H.mouline(Mor)/Sabil2 |
| Nile | ICARDA | Snipe/Fg |
| Ouassara | ICARDA | Ouasloukos1/5/Azn1/4/BezaiSHF//SD19539/Waha/3/Gdr2 |
| Ourgh | Morocco | D67gta/2/Boyero/Bit//Mexicali |
| Saintly | Australia | Tamaroi/WLYY9//WLYY96a1773 |
| Secondroue | ICARDA | Stj3//Bcr/Lks4/3/Ter3/4/Bcr/Gro1//Mgnl1 |

**Table S2.** Correlation (r), linear regression estimated via ordinary least squares (OLS) and flexible regression estimated via regression additive model. a; under heat stress. b; under normal conditions.

1. Plastic tunnel-mediated heat stress

| Trait | *r* | OLS regression | | | GAM | | | L-R test |
| --- | --- | --- | --- | --- | --- | --- | --- | --- |
| *B* | *t* | Deviance | E.D.F. | *F* | Deviance (%) |
| Biomass | 0.61** | 0.18 | 4.85** | 37.10 | 1.00 | 23.54** | 37.10 | ** |
| HI | 0.73** | 6702.90 | 6.65** | 52.50 | 2.69 | 19.75** | 64.00 | ** |
| Spkm² | 0.18ns | 1.24 | 1.16ns | 3.29 | 1.00 | 1.35ns | 3.29 | * |
| GNspk | 0.81** | 179.95 | 8.72** | 65.50 | 2.64 | 30.37** | 72.80 | * |
| TKW | 0.49** | 51.72 | 3.58** | 24.30 | 1.16 | 10.48** | 25.00 | ns |

1. Normal conditions

| Trait | *r* | OLS regression | | | GAM | | | L-R test |
| --- | --- | --- | --- | --- | --- | --- | --- | --- |
| *b* | *t* | Deviance | E.D.F. | *F* | Deviance (%) |
| Biomass | 0.67** | 0.24 | 5.71** | 44.90 | 2.52 | 12.45** | 51.80 | ns |
| HI | 0.55** | 7203.30 | 4.12** | 29.80 | 1.14 | 14.24** | 30.40 | ns |
| Spkm² | 0.45** | 4.64 | 3.19** | 20.20 | 1.00 | 10.14** | 20.20 | ** |
| GNspk | 0.66** | 139.90 | 5.54** | 43.40 | 1.00 | 30.76** | 43.50 | ** |
| TKW | 0.56** | 151.62 | 4.32** | 31.90 | 2.76 | 7.43** | 42.00 | ns |

**Table S3.** Markers associated with days to heading (DTH) under heat stress and normal conditions.

| Locus |  | Chr. | Main marker | Position | Max LOD | Max r² | Heat stress | Normal conditions |
| --- | --- | --- | --- | --- | --- | --- | --- | --- |
| MTA.DTH.01 |  | 4A | AX-94954115 | 135455654 | 3.1 | 0.29 | * | * |
| MTA.DTH.02 |  | 4B | AX-95082485 | 417259719 | 3.1 | 0.29 | * | * |
| MTA.DTH.03 |  | 4B | AX-94397040 | 418863736 | 3.1 | 0.29 | * | * |
| MTA.DTH.04 |  | 6A | AX-94732269 | 65926884 | 3.1 | 0.27 |  | * |

**Table S4.** Pearson correlation matrix between all the measured traits under heat conditions (upper part) and normal (lower part) conditions. GY – Grain yield; Biom – Biomass; HI – Harvest index; Spkm² - Spikes per square meter: GNspk - Grain number per spike; TKW – Thousand kernel weight; DTH – Days to heading. *, ** Significant at the 0.05 and 0.01 probability levels, respectively.

|  | GY | Biom | HI | Spkm² | GNspk | TKW | DTH |
| --- | --- | --- | --- | --- | --- | --- | --- |
| GY |  | 0.61** | 0.73** | 0.18 ns | 0.81** | 0.49** | 0.09 ns |
| Biom | 0.67** |  | -0.02 ns | 0.36* | 0.30* | 0.44** | 0.07 ns |
| HI | 0.54** | -0.18 ns |  | -0.09 ns | 0.78** | 0.28 ns | 0.01 ns |
| Spkm² | 0.45** | 0.53** | 0.02 ns |  | -0.12 ns | -0.04 ns | 0.03 ns |
| GNspk | 0.67** | 0.27 ns | 0.51** | -0.27 ns |  | 0.16 ns | -0.18 ns |
| TKW | 0.56** | 0.44** | 0.35* | 0.28 ns | 0.06 ns |  | 0.17 ns |
| DTH | -0.18 ns | 0.19 ns | -0.44** | -0.06 ns | -0.17 ns | -0.09 ns |  |

**a-**

**b-**

**Figure S1.** Plots of the additive regression model showing GNspk, biom, TKW, spkm² and HI as the spline function of the target trait grain yield (GY). a; under heat stress. b; under normal conditions
